# Supplementary material for: Hindi translation of Berlin questionnaire and its validation as a screening instrument for obstructive sleep apnea
Source: PubMed Central journal article supplement — J Neurosci Rural Pract. 2016 Apr-Jun;7(2):244–9. doi: 10.4103/0976-3147.176187 (PMC4821933; doi:10.4103/0976-3147.176187), 2016
Supplement: JNRP-7-244-Suppl1.pdf [file JNRP-7-244-Suppl1.pdf]

बर्लिन प्रश्नावली © 1997 IONSLEEP (Annexure)

1. कृपया निम्न प्रश्नों के उत्तर दें—  
ऊँचाई ..... उम्र.....  
वजन ..... पुरुष / महिला
2. क्या आपको खर्राटे आते हैं ?  
 हाँ  
 नहीं  
 पता नहीं  
अगर आप खर्राटे लेते हैं—
3. तो आपके खर्राटे—  
 साँस की आवाज से थोड़ा तेज होते हैं।  
 बात करने की आवाज जितना तेज होते हैं।  
 बात करने की आवाज से ज्यादा तेज होते हैं।  
 बहुत तेज होते हैं। पास वाले कमरे में सुने जा सकते हैं।
4. आप कितनी बार खर्राटे लेते हैं —  
 करीब — करीब हर दिन  
 सप्ताह में 3–4 बार  
 सप्ताह में 1–2 बार  
 महीने में 1–2 बार  
 कभी नहीं या करीब—2 कभी नहीं
5. क्या कभी आपके खर्राटों की वजह से दूसरो को परेशानी हुई है ?  
 हाँ  
 नहीं
6. क्या कभी किसी ने ध्यान दिया कि नींद में आपकी साँस रुक जाती है ?  
 करीब —करीब हर दिन  
 सप्ताह में 3–4 बार  
 सप्ताह में 1–2 बार  
 महीने में 1–2 बार  
 कभी नहीं या करीब—2 कभी नहीं
7. सोकर उठने के बाद भी कितनी बार आप थका हुआ महसूस करते हैं ?  
 करीब—करीब हर दिन  
 सप्ताह में 3–4 बार  
 सप्ताह में 1–2 बार  
 महीने में 1–2 बार  
 कभी नहीं या करीब—2 कभी नहीं
8. क्या आप जागते हुए थका हुआ महसूस करते हैं ?  
 करीब—करीब हर दिन  
 सप्ताह में 3–4 बार  
 सप्ताह में 1–2 बार  
 महीने में 1–2 बार  
 कभी नहीं या करीब—2 कभी नहीं
9. क्या कभी आप वाहन चलाते हुए सो गए हैं या आपको झपकी आई है ?  
 हाँ  
 नहीं  
अगर हाँ तो ऐसा कितनी बार होता है ?  
 करीब—करीब हर दिन  
 सप्ताह में 3–4 बार  
 सप्ताह में 1–2 बार

- महीने में 1–2 बार  
 कभी नहीं या करीब–2 कभी नहीं
10. क्या आपको उच्च रक्त चाप (हाई बी. पी.) है ?  
 हाँ  
 नहीं  
बी. एम. आई.  $> 30 \text{ kg/m}^2$   
 हाँ  
 नहीं
